# Supplementary material for: Supercapacitive performance of hydrogenated TiO2nanotube arrays decorated with nickel oxide nanoparticles
Source: Royal Society of Chemistry journal article supplement (doi:10.1039/c5ra25581c), 2016-01-01
Supplement: c5ra25581c1.pdf [file c5ra25581c1.pdf]

## Supporting Information

### Supercapacitive performance of hydrogenated TiO<sub>2</sub> nanotube arrays decorated with nickel oxides nanoparticles

L.H. Cui,<sup>ab</sup> Y. Wang,<sup>\*ac</sup> X. Shu,<sup>ad</sup> J.F. Zhang,<sup>a</sup> C.P. Yu,<sup>a</sup> J.W. Cui,<sup>ad</sup> H.M. Zheng,<sup>a</sup> Y. Zhang,<sup>ad</sup> Y.C. Wu<sup>\*ad</sup>

<sup>a</sup> School of Materials Science and Engineering, Hefei University of Technology, Hefei 230009, P. R. China; Email: Stone@hfut.edu.cn; ycwu@hfut.edu.cn

<sup>b</sup> School of Materials Science and Engineering, Beifang university of Nationalities, Yinchuan 750021, P. R. China

<sup>c</sup> Department of Material Science and NanoEngineering, Rice University, Houston, Texas 77005, United States

<sup>d</sup> Key Laboratory of Advanced Functional Materials and Devices of Anhui Province, Hefei 230009, P. R. China

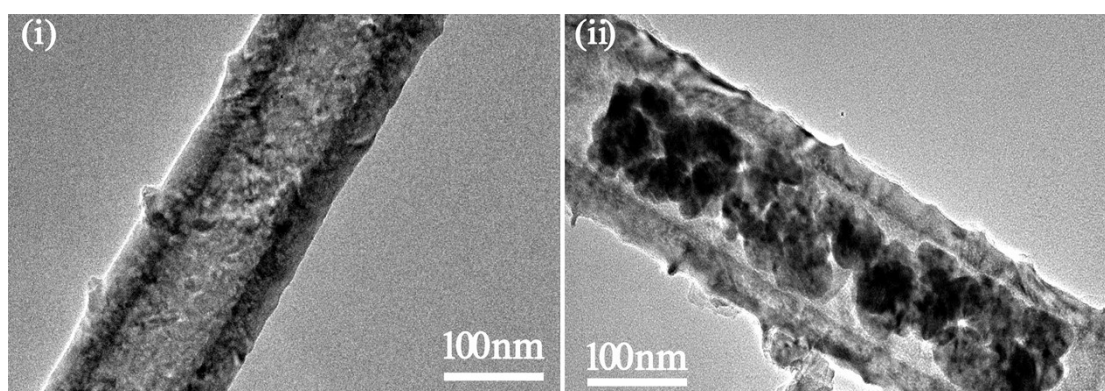

**Fig. S1** TEM micrograph of individual (i) HTNTAs, (ii) NiO<sub>x</sub> nanoparticle in the HTNTAs

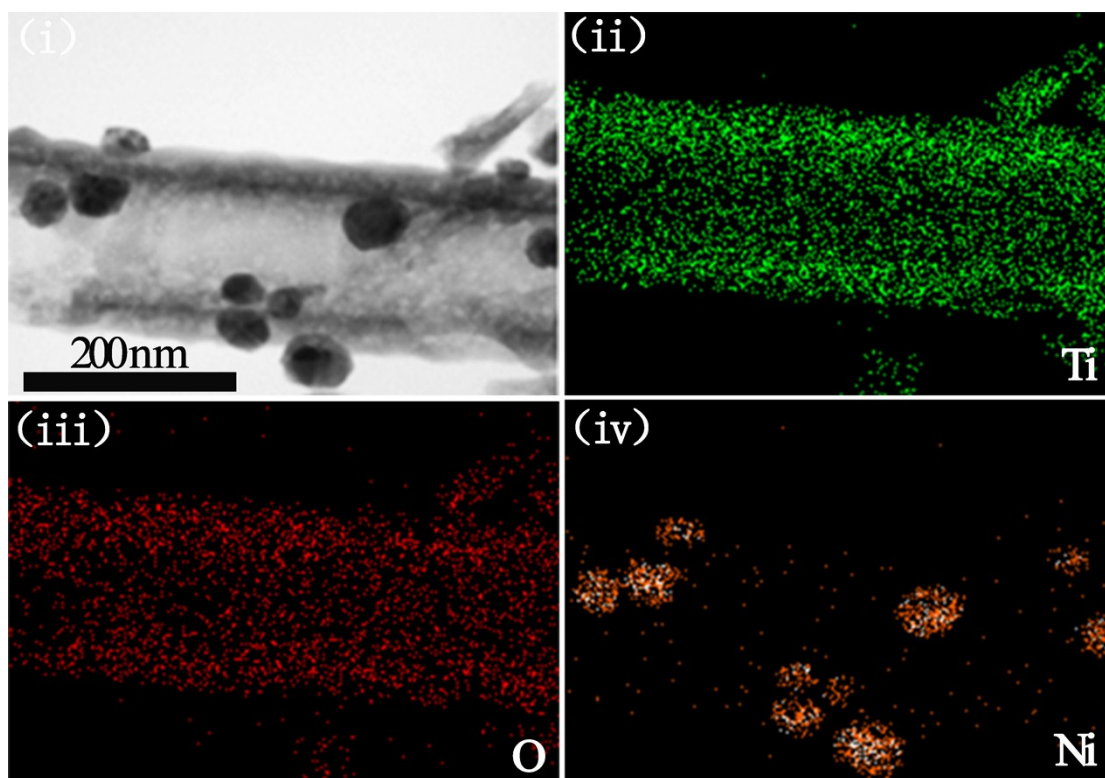

**Fig. S2** (ii-iv) EDX mapping of (i) an individual  $\text{NiO}_x/\text{HTNTAs}$  nanocomposite.

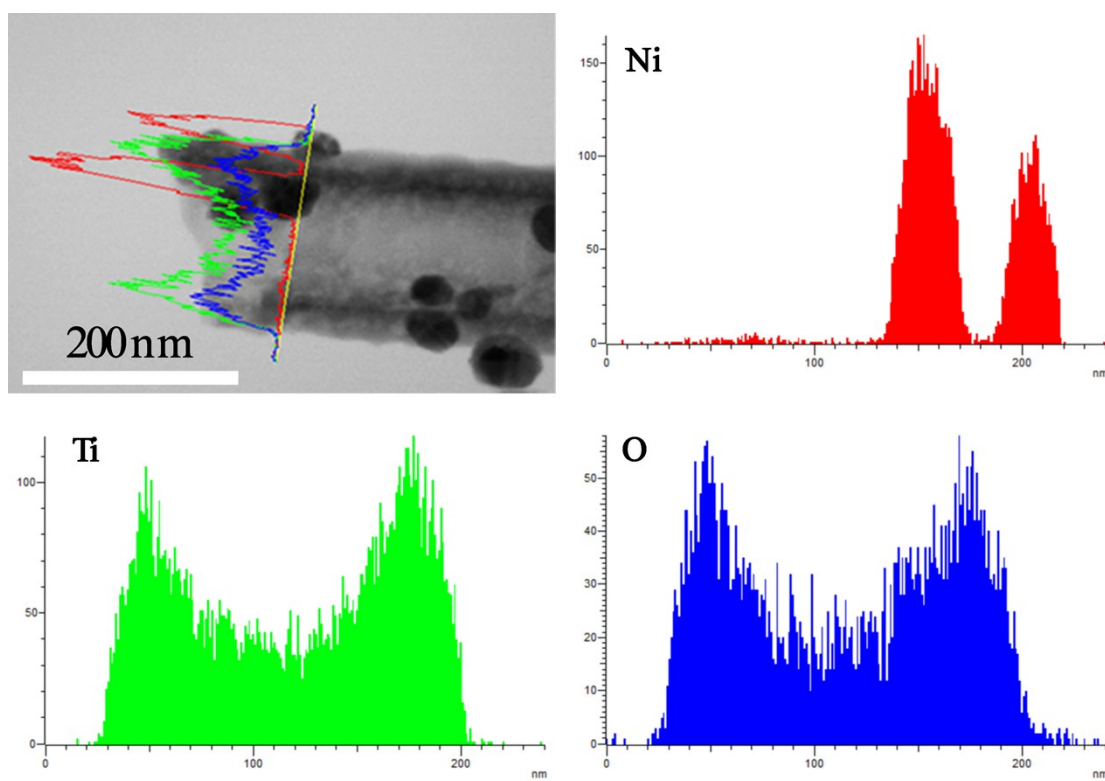

**Fig. S3** EDX scanning micrograph of individual  $\text{NiO}_x/\text{HTNTAs}$  nanocomposite

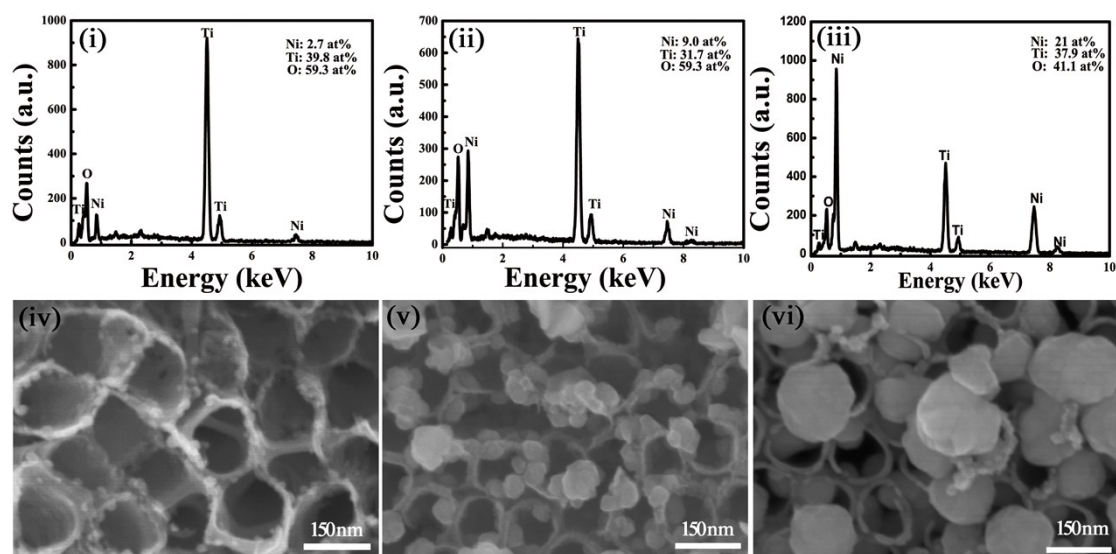

**Fig. S4** The investigation of Ni loading amount and performance for  $\text{NiO}_x/\text{HTNTAs}$  prepared by 5mM, 10mM and 15mM  $\text{Ni}(\text{AC})_2$  solution: the EDX spectra of (i) 5- $\text{NiO}_x/\text{HTNTAs}$ , (ii) 10- $\text{NiO}_x/\text{HTNTAs}$ , (iii) 15- $\text{NiO}_x/\text{HTNTAs}$  ; the FESEM image of (iv) 5- $\text{NiO}_x/\text{HTNTAs}$ , (v) 10- $\text{NiO}_x/\text{HTNTAs}$ , (vi) 15- $\text{NiO}_x/\text{HTNTAs}$ .
